# Supplementary material for: Ionothermal template transformations for preparation of tubular porous nitrogen doped carbons
Source: Royal Society of Chemistry journal article supplement (doi:10.1039/c6mh00592f), 2017-01-01
Supplement: c6mh00592f1.pdf [file c6mh00592f1.pdf]

## Electronic Supplementary Information (ESI†)

# Ionothermal Template Transformations for Preparation of Tubular Porous Nitrogen Doped Carbons

J. Pampel\*, A. Mehmood, M. Antonietti, and T.-P. Fellerger\*

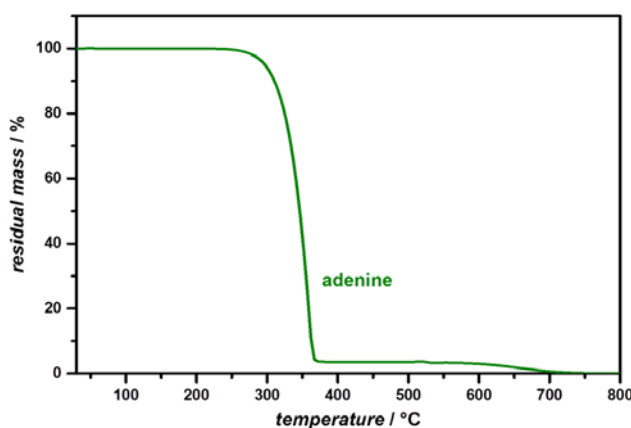

**Fig. S1** Thermogravimetric analysis of the thermal decomposition of adenine in inert gas atmosphere.

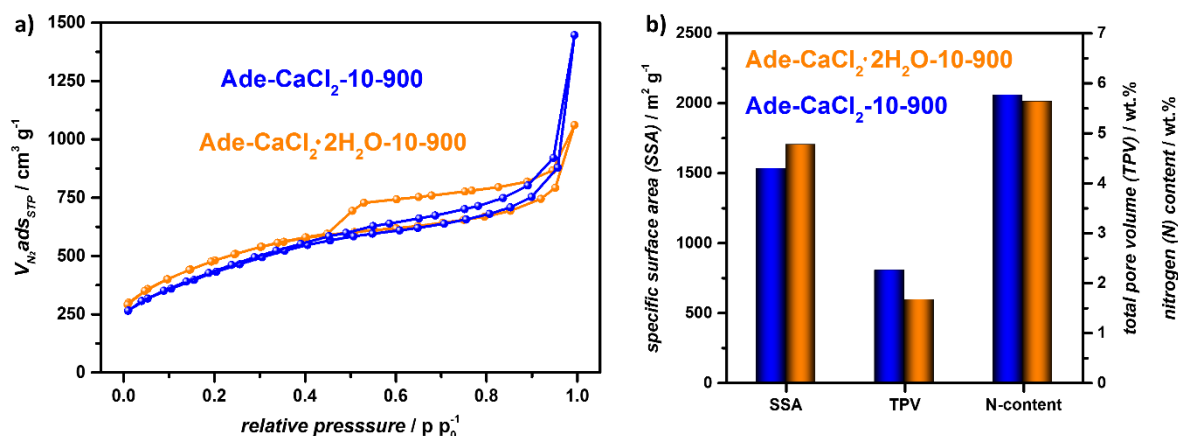

**Fig. S2** a) Nitrogen physisorption isotherms and b) SSA, TPV, and N-content of adenine derived NDCs using either CaCl<sub>2</sub> or CaCl<sub>2</sub> · 2 H<sub>2</sub>O as salt. The precursor to salt wt.-ratio was fixed to 1:10 in both cases.

CaCl<sub>2</sub> results in a composite isotherm of type I(b) and type III coupled with a small H3 hysteresis pointing to micropores and a high amount of large interstitial pores. Contrarily, the isotherm of Ade-CaCl<sub>2</sub> · 2 H<sub>2</sub>O can be described as type I(b) with a H4 hysteresis showing less N<sub>2</sub> uptake at high pressures. This indicates that the application of CaCl<sub>2</sub> · 2 H<sub>2</sub>O promotes the general miscibility of adenine and salt phase leading to smaller pores which can also explain the ~ 10 % higher SSA in the case of the hydrated salt.

**Table S1** Different characteristics of Ade-CaCl<sub>2</sub>-10-900 and Ade-CaCl<sub>2</sub> · 2 H<sub>2</sub>O-10-900: specific surface area and total pore volume obtained from nitrogen physisorption, elemental composition (C, H, N) obtained by combustion analysis, and calculated carbon yield as well as total yield.

| <i>sample</i>                                     | $SSA_{BET}$<br>/ m <sup>2</sup> g <sup>-1</sup> | $TPV_{p/p_0 = 0.99}$<br>/ cm <sup>3</sup> g <sup>-1</sup> | <i>C – content</i><br>/ wt. % | <i>H – content</i><br>/ wt. % | <i>N – content</i><br>/ wt. % | <i>carbon yield</i> / % | <i>total yield</i> / % |
|---------------------------------------------------|-------------------------------------------------|-----------------------------------------------------------|-------------------------------|-------------------------------|-------------------------------|-------------------------|------------------------|
| Ade-CaCl <sub>2</sub> -10-900                     | 1530                                            | 2.24                                                      | 76.5                          | 1.7                           | 5.8                           | 15.6                    | 9.0                    |
| Ade-CaCl <sub>2</sub> · 2 H <sub>2</sub> O-10-900 | 1700                                            | 1.65                                                      | 85.8                          | 1.5                           | 5.6                           | 25.7                    | 13.3                   |

Apparently, the hydrated form of CaCl<sub>2</sub> supports the fixation of gaseous decomposition products of adenine which points to a molten state of the salt during initial adenine crosslinking. The very low carbon yield of the Ade-CaCl<sub>2</sub>-10-900 points to adenine decomposition in manner of a solid-state reaction. Hence, the carbonization takes place on the surface of the solid CaCl<sub>2</sub> particles which goes along with the graphene like morphology observed by SEM and TEM (Fig. S3a+b).

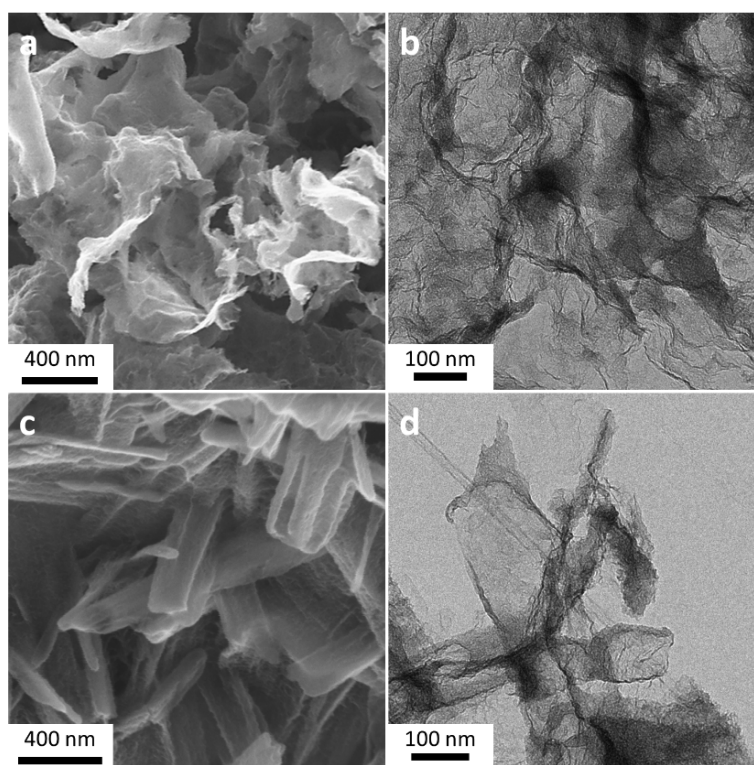

**Fig. S3** a) SEM and b) TEM image of Ade-CaCl<sub>2</sub>-10-900. c) SEM and d) TEM image of Ade-CaCl<sub>2</sub> · 2 H<sub>2</sub>O-10-900.

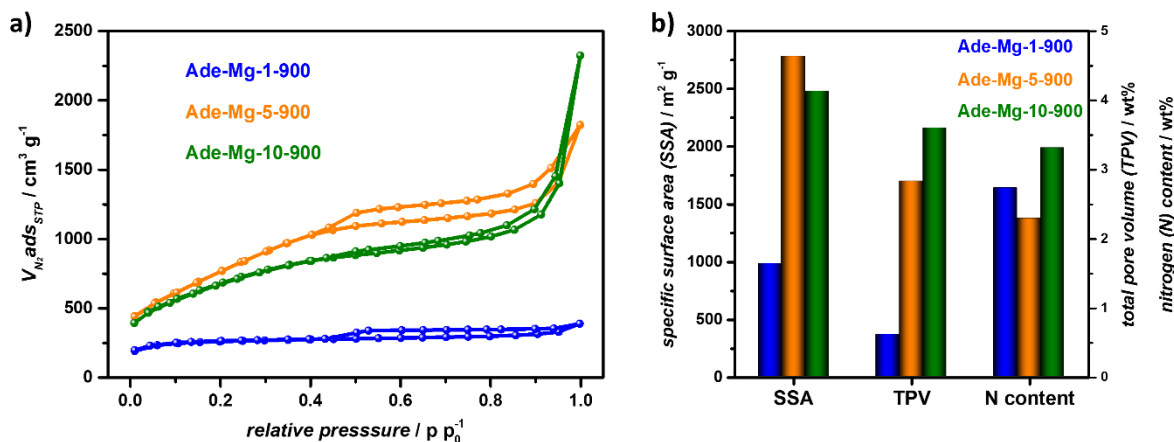

**Fig. S4** a) Nitrogen physisorption isotherms and b) SSA, TPV, and N-content of Ade-Mg-1-900, Ade-Mg-5-900 and Ade-Mg-10-900

**Table S2.** Different characteristics of Ade-Mg-1-900, Ade-Mg-5-900, and Ade-Mg-10-900: surface area and total pore volume obtained from nitrogen physisorption, elemental composition (C, H, N) obtained by combustion analysis, and calculated carbon yield as well as total yield.

| <i>sample</i> | $SSA_{BET} / \text{m}^2 \text{g}^{-1}$ | $TPV_{p/p_0=0.99} / \text{cm}^3 \text{g}^{-1}$ | <i>C</i> – content / wt. % | <i>H</i> – content / wt. % | <i>N</i> – content / wt. % | <i>carbon yield</i> / % | <i>total yield</i> / % |
|---------------|----------------------------------------|------------------------------------------------|----------------------------|----------------------------|----------------------------|-------------------------|------------------------|
| Ade-Mg-1-900  | 980                                    | 0.61                                           | 80.0                       | 1.6                        | 2.7                        | 17                      | 10.8                   |
| Ade-Mg-5-900  | 2780                                   | 2.83                                           | 88.3                       | 1.3                        | 2.3                        | 25.6                    | 13.7                   |
| Ade-Mg-10-900 | 2480                                   | 3.60                                           | 85.4                       | 1.3                        | 3.3                        | 26.4                    | 13.8                   |

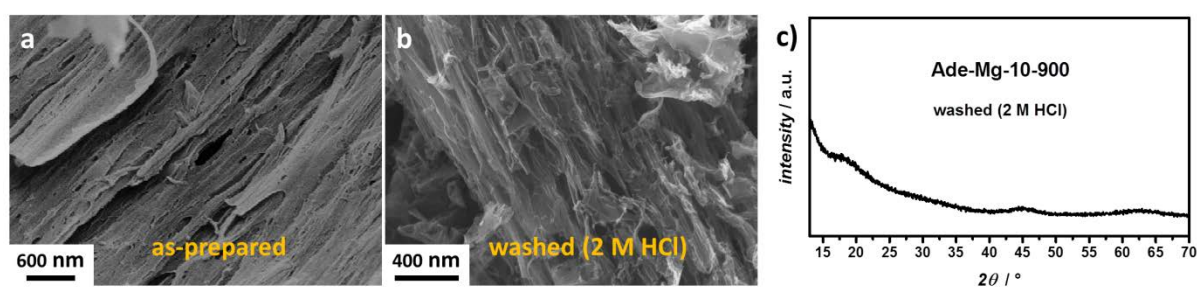

**Fig. S5** a) SEM image of Ade-Mg-10-900\_as-prepared, b) SEM image of Ade-Mg-10-900 (after acidic work-up), and c) PXRD of Ade-Mg-10-900 (after acidic work-up).

Any influence of the work-up on the morphology can be excluded as SEM reveals the fibrous domains already in the unwashed material. Moreover, all (crystalline) inorganic species are completely removed during the final washing in 2 M HCl.

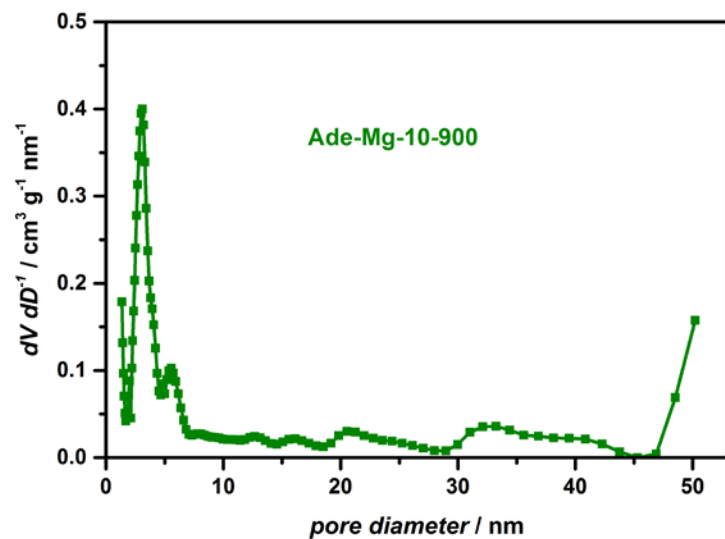

**Fig. S6** Pore size distribution of Ade-Mg-10-900.

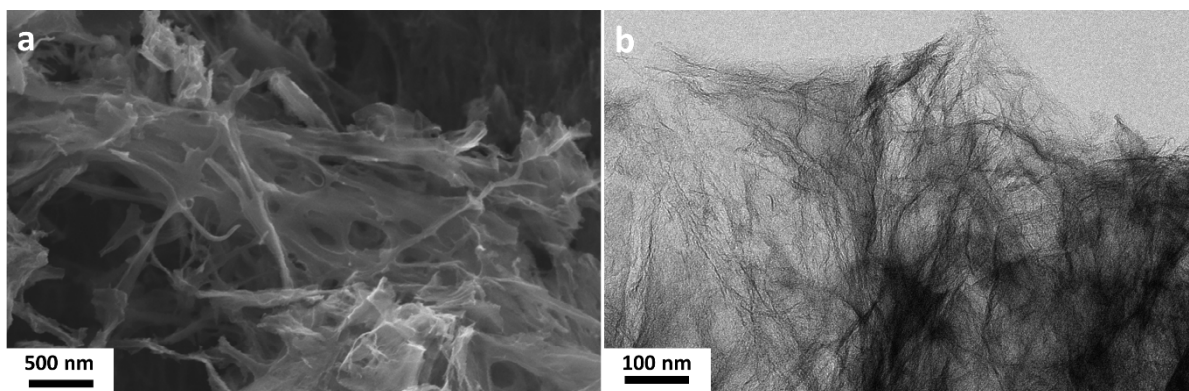

**Fig. S7** a) SEM and b) TEM image of Ade-Mg-10-900 depicting a region with randomly oriented pores.

**Table S3** Different characteristics of the Ade-Mg-10-X samples (X represents different synthesis temperatures): surface area and total pore volume obtained from nitrogen physisorption, elemental composition (C, H, N) obtained by combustion analysis, and calculated carbon yield as well as total yield.

| <i>sample</i>  | $SSA_{BET}$<br>/ $m^2 g^{-1}$ | $TPV_{p/p_0=0.99}$<br>/ $cm^3 g^{-1}$ | <i>C</i> – content<br>/ wt. % | <i>H</i> – content<br>/ wt. % | <i>N</i> – content<br>/ wt. % | <i>carbon</i><br>yield / % | <i>total</i><br>yield / % |
|----------------|-------------------------------|---------------------------------------|-------------------------------|-------------------------------|-------------------------------|----------------------------|---------------------------|
| Ade-Mg-10-500  | 35                            | 0.13                                  | 47.6                          | 3.4                           | 31                            | -                          | -                         |
| Ade-Mg-10-600  | 700                           | 0.88                                  | 49.1                          | 3.3                           | 27.1                          | -                          | -                         |
| Ade-Mg-10-700  | 1380                          | 1.60                                  | 55.0                          | 2.5                           | 26.0                          | 34.1                       | 29                        |
| Ade-Mg-10-800  | 2680                          | 3.42                                  | 68.21                         | 2.4                           | 15.4                          | 29.4                       | 19.2                      |
| Ade-Mg-10-875  | 2490                          | 3.68                                  | 83.56                         | 1.5                           | 5.3                           | 25.9                       | 13.8                      |
| Ade-Mg-10-900  | 2480                          | 3.60                                  | 85.43                         | 1.3                           | 3.31                          | 26.4                       | 13.8                      |
| Ade-Mg-10-925  | 2500                          | 3.67                                  | 86.9                          | 1.5                           | 2.45                          | 26.8                       | 13.7                      |
| Ade-Mg-10-1000 | 2230                          | 3.67                                  | 88.17                         | 1.2                           | 2.04                          | 28.2                       | 14.2                      |

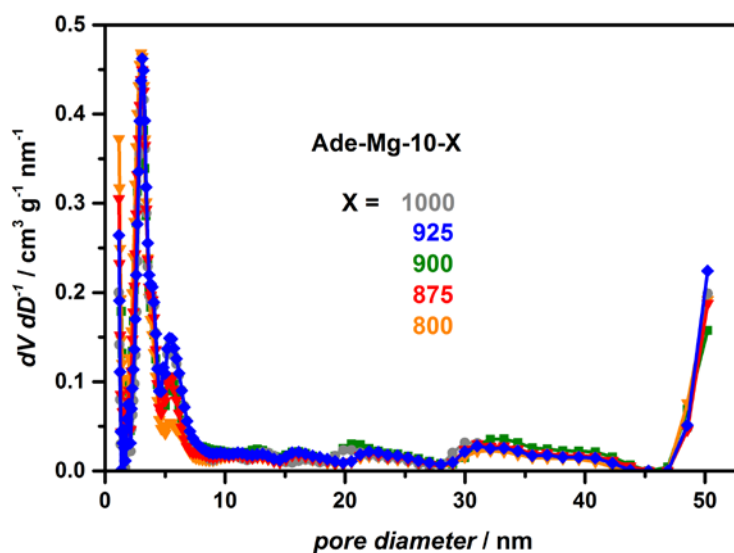

**Fig. S8** Pore size distribution of the Ade-Mg-10 samples prepared at different synthesis temperatures.

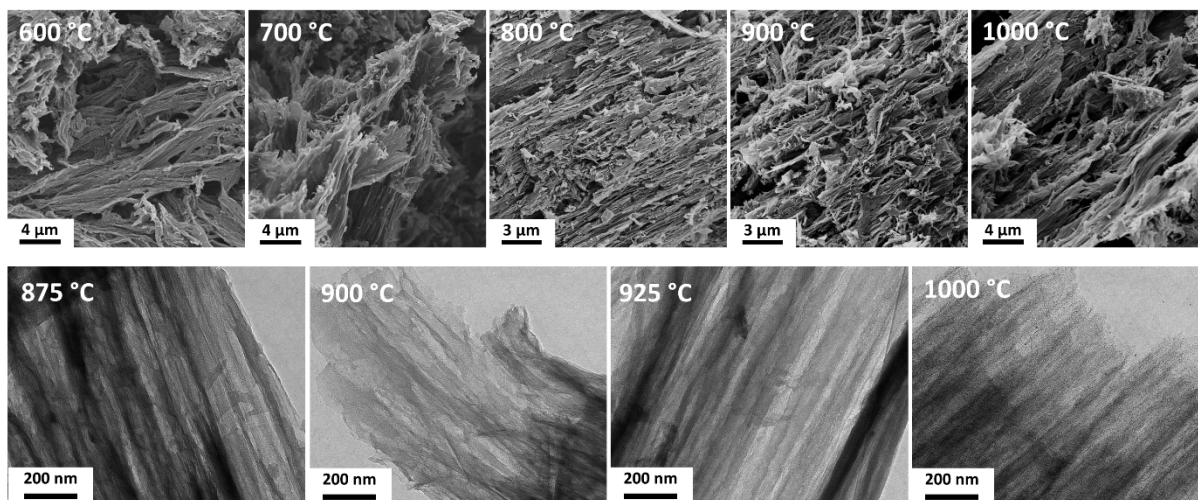

**Fig. S9** Representative SEM images (upper row) and TEM images (lower row) of the Ade-Mg-10-X samples (X represents the synthesis temperature and is given in the respective image).

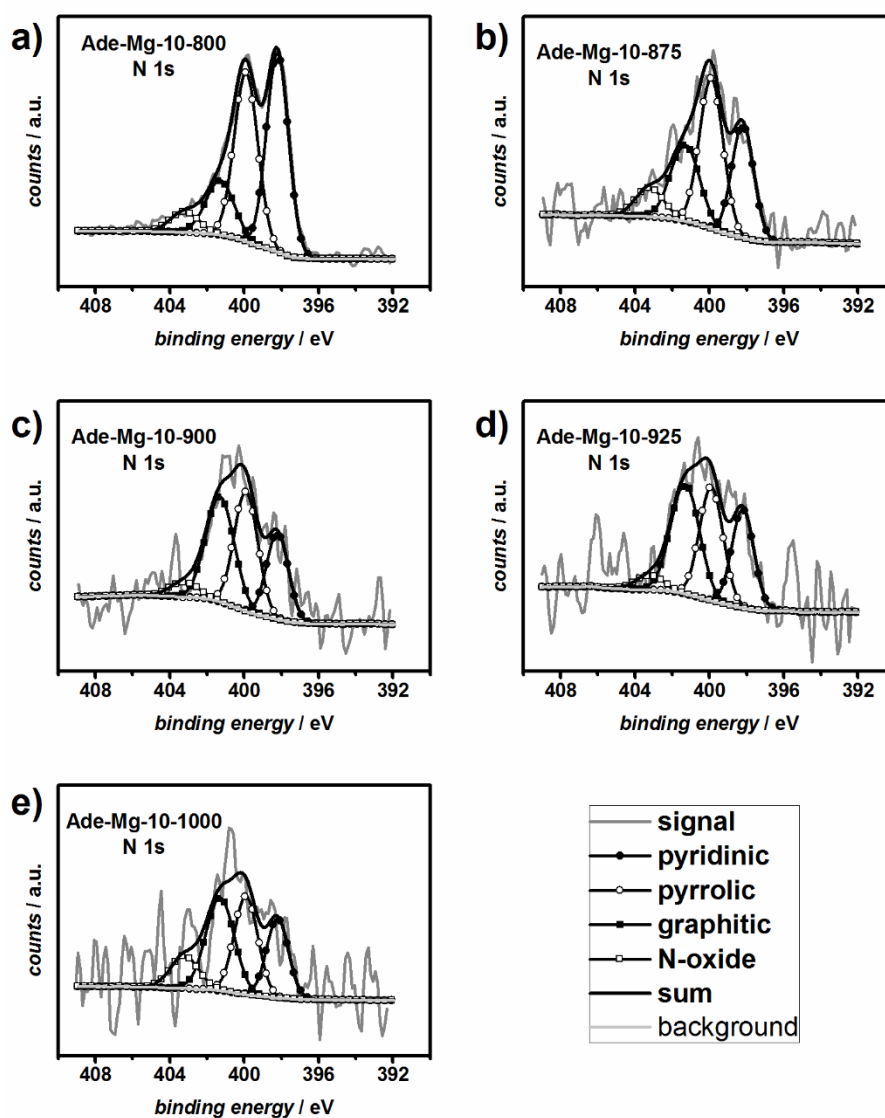

**Fig. S10** N1s XPS spectra of the Ade-Mg-10 samples prepared at different synthesis temperatures. a) Ade-Mg-10-800, b) Ade-Mg-10-875, c) Ade-Mg-10-900, d) Ade-Mg-10-925, e) Ade-Mg-10-1000. Deconvoluted nitrogen peaks: pyridinic-N (398.2 eV); pyrrolic-N (399.9 eV); graphitic-N (401.3 eV), oxidized-N (403.2 eV).

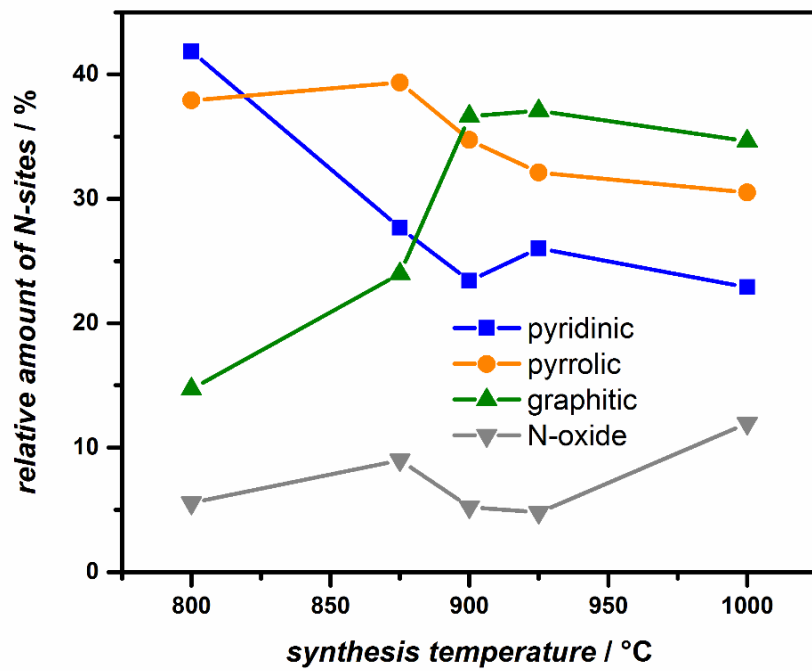

**Fig. S11** Relative amount of N-sites of the Ade-Mg-10 samples prepared at different synthesis temperatures (quantified by XPS).

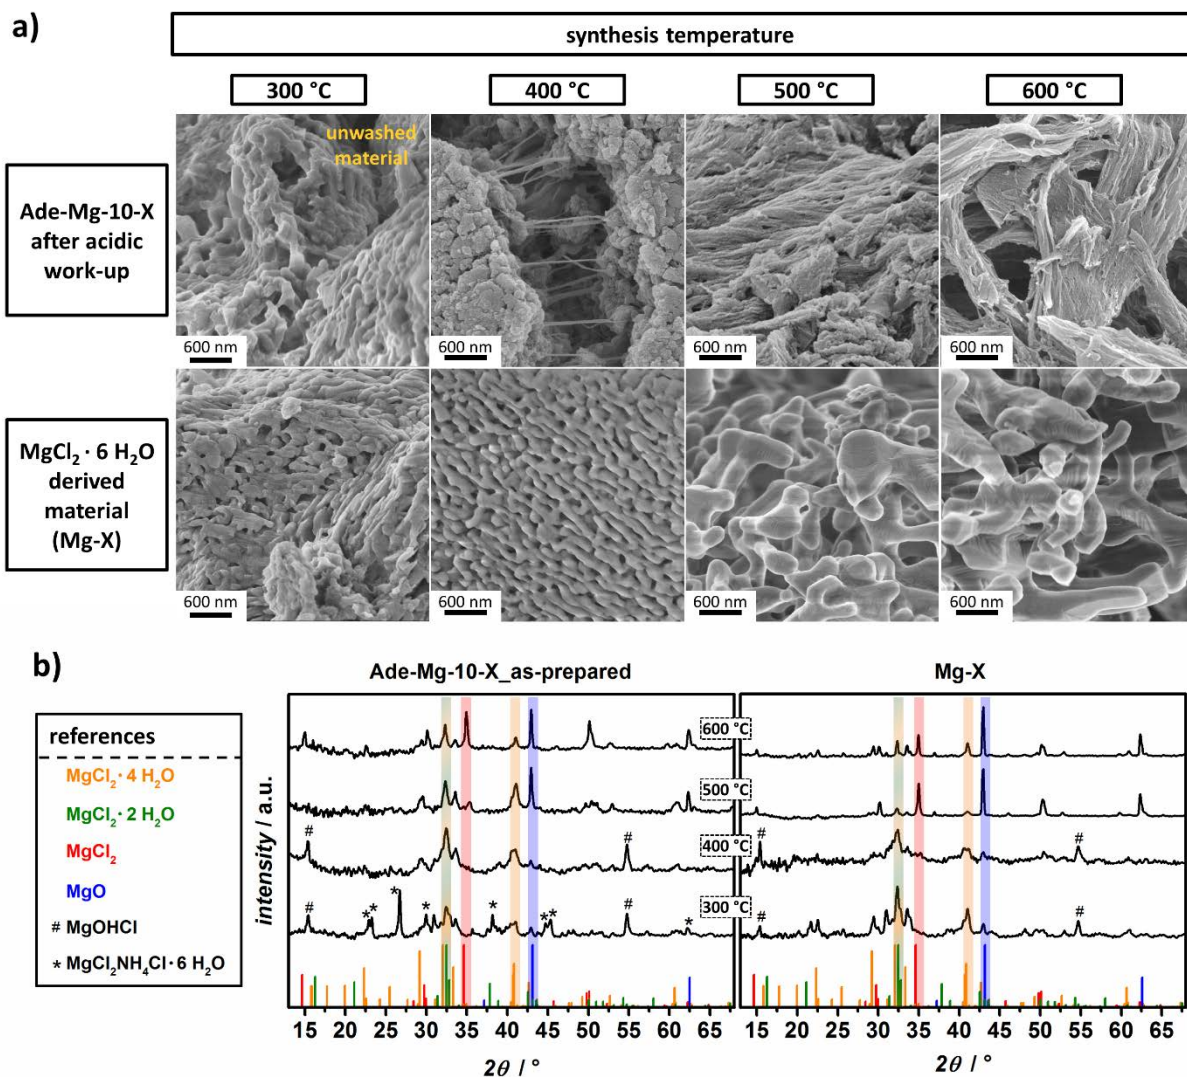

**Fig. S12** a) SEM images of the Ade-Mg-10-X samples (upper row) and of the MgCl<sub>2</sub> · 6 H<sub>2</sub>O derived materials (bottom row) synthesized at different temperatures (300 – 600 °C). Ade-Mg-10-300 dissolved completely during the acidic work-up indicating that only small or instable adenine crosslinked pre-NDC domains were formed at such a low temperature. b) Normalized PXR D diffractograms of the corresponding unwashed materials (ICDD numbers of the references are given in Table S4).



**Table S4** ICDD numbers of the PXRD reference patterns.

| <i>substance</i>                                          | <i>ICDD number</i> |
|-----------------------------------------------------------|--------------------|
| MgO                                                       | 04-016-6275        |
| MgCl <sub>2</sub>                                         | 04-008-7748        |
| MgCl <sub>2</sub> · 2 H <sub>2</sub> O                    | 00-061-0221        |
| MgCl <sub>2</sub> · 4 H <sub>2</sub> O                    | 04-015-2200        |
| Mg(OH)Cl                                                  | 00-003-0100        |
| MgCl <sub>2</sub> NH <sub>4</sub> Cl · 6 H <sub>2</sub> O | 01-080-5969        |

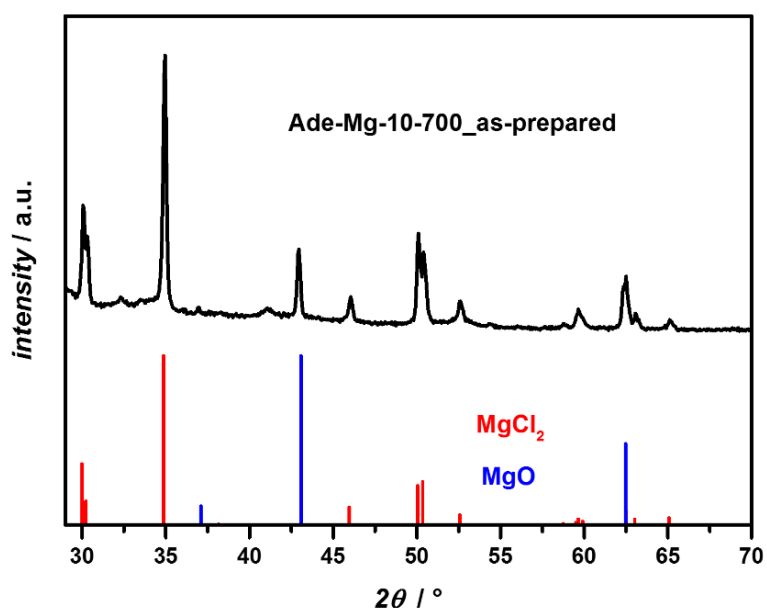

**Fig. S13** a) PXRD of Ade-Mg-10-700\_as-prepared (the ICDD numbers of the PXRD can be found in Table S4).

It is to consider that MgCl<sub>2</sub> is highly hygroscopic causing water uptake during the grinding of the material after the synthesis and during the PXRD measurements under ambient conditions. Thus, all unwashed (\_as-prepared and Mg-X) samples were protected with amorphous tape to avoid the hydration during the PXRD measurements.

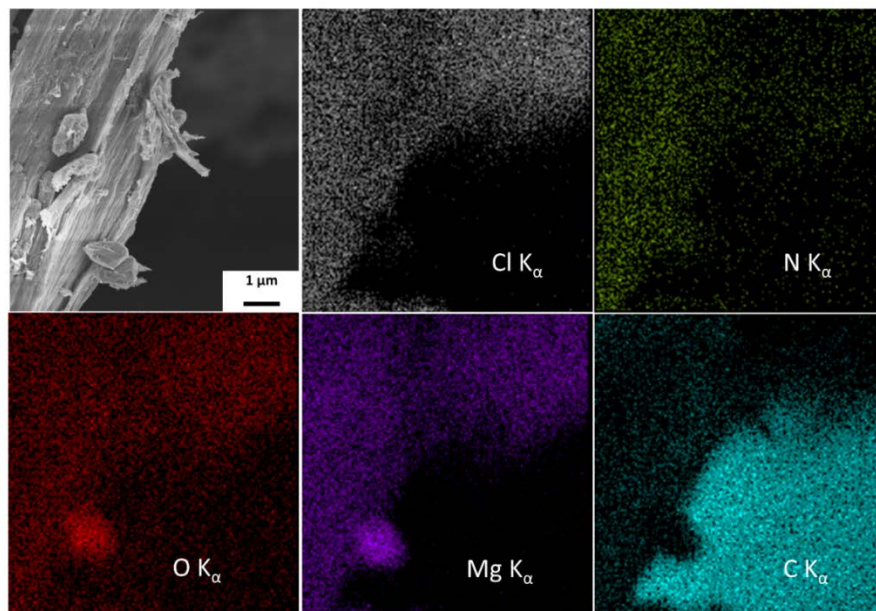

**Fig. S14** EDX analysis (elemental mapping) of Ade-Mg-10-700<sub>as prepared</sub>. The inverse contrast of the C K<sub>α</sub>-signal is caused by the carbon tape of the SEM holder.

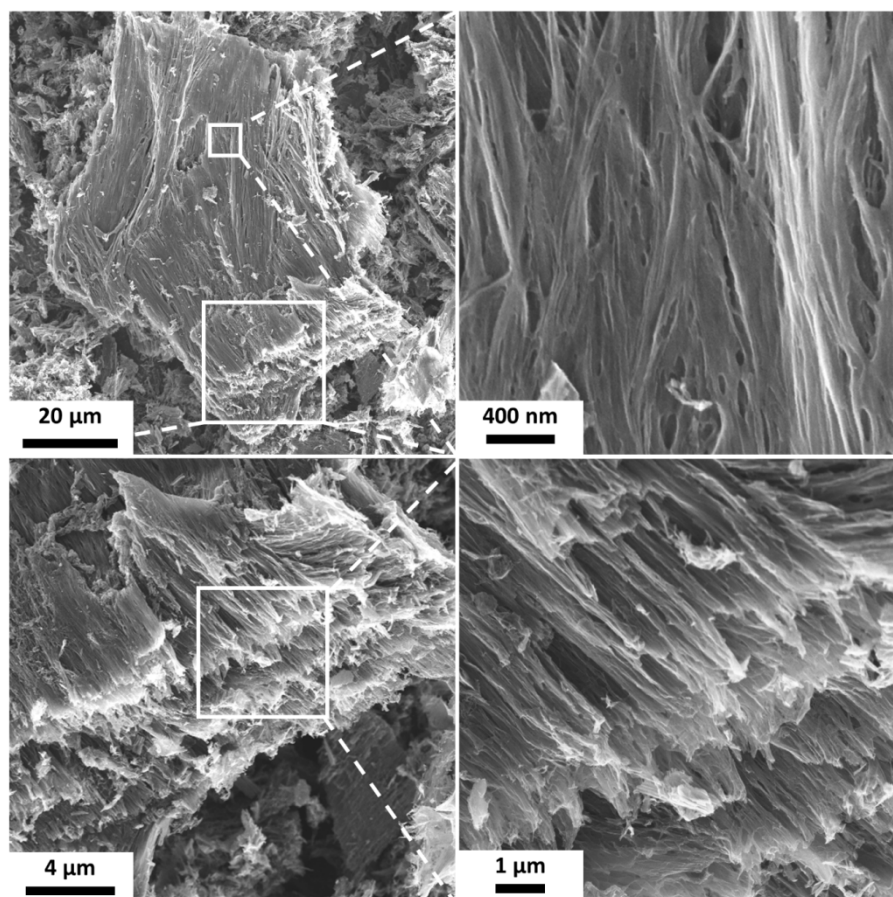

**Fig. S15** SEM images with different magnifications of the material synthesized in the same fashion as Ade-Mg-10-900 but with an additional isothermal heating at 400 °C for ten hours during the typically used heating procedure. The images show the possibility to obtain large areas of fibrous NDC containing very long tubular pores.

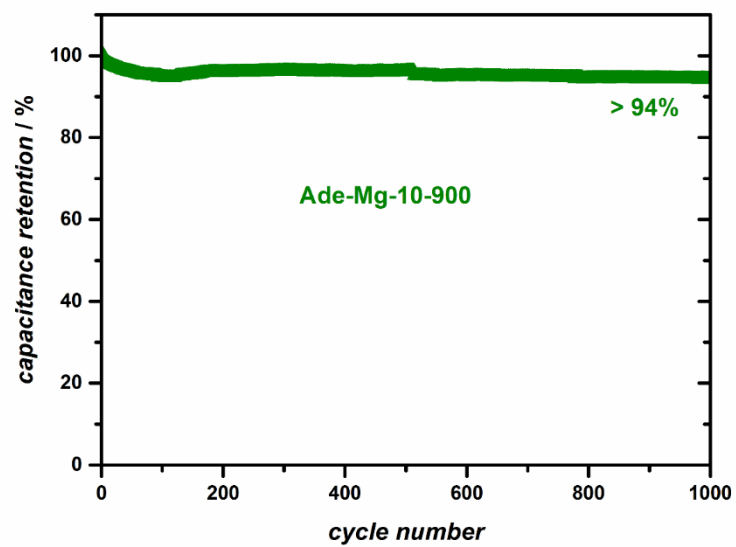

**Fig. S16** Capacitance retention of Ade-Mg-10-900 in a two electrode set-up employing a constant charge/discharge current of  $10 \text{ A g}^{-1}$ .
